# Supplementary material for: Climax thinking on the coast: a focus group priming experiment with coastal property owners about climate adaptation
Source: Springer Nature journal article supplement (doi:10.1007/s00267-022-01676-x), 2022-06-30
Supplement: MOESM2 [file 23227058]

Sherren K, Sutton K, Chappell E. (2022) Climax thinking on the coast: a focus group priming experiment with coastal property owners about climate adaptation. *Environmental Management*. DOI: 10.1007/s00267-022-01676-x

## Supplementary Materials 2

Table S2.1 Exploratory Factor Analysis results of all 16 pre- and post-test statements

| Variable | Factor 1      | Factor 2      | Factor 3      | Factor 4      | Factor 5      | Uniqueness |
|----------|---------------|---------------|---------------|---------------|---------------|------------|
| Q1A      | 0.1747        | 0.0637        | 0.1619        | 0.0245        | <b>0.8020</b> | 0.2954     |
| Q1B      | <b>0.7473</b> | -0.1430       | 0.0009        | 0.3311        | 0.2008        | 0.2712     |
| Q1C      | <b>0.5834</b> | 0.1016        | 0.2300        | 0.0123        | 0.1301        | 0.5793     |
| Q1D      | <b>0.6533</b> | 0.1710        | -0.1223       | -0.0255       | 0.4255        | 0.3472     |
| Q1E      | 0.0866        | -0.0883       | <b>0.8306</b> | 0.1229        | 0.0835        | 0.2727     |
| Q1F      | 0.0321        | 0.0695        | <b>0.8584</b> | -0.0604       | 0.0392        | 0.2520     |
| Q1G      | <b>0.7145</b> | 0.2681        | 0.0710        | -0.3186       | -0.0341       | 0.3098     |
| Q1H      | <b>0.8254</b> | -0.0880       | 0.0750        | 0.0758        | -0.0754       | 0.2939     |
| Q2A      | -0.0938       | 0.0911        | 0.3647        | <b>0.6608</b> | -0.0532       | 0.4104     |
| Q2B      | 0.1390        | 0.2122        | -0.0516       | <b>0.6653</b> | 0.2425        | 0.4315     |
| Q2C      | 0.1106        | 0.1349        | -0.0758       | <b>0.6244</b> | -0.2075       | 0.5309     |
| Q2D      | 0.0689        | 0.1951        | -0.3565       | <b>0.4193</b> | -0.3161       | 0.5544     |
| Q2E      | -0.0238       | <b>0.8229</b> | -0.0659       | 0.0024        | 0.1513        | 0.2950     |
| Q2F      | 0.0685        | <b>0.7770</b> | 0.0255        | 0.1774        | 0.0053        | 0.3594     |
| Q2G      | -0.0284       | <b>0.5359</b> | 0.0363        | 0.2303        | -0.0239       | 0.6571     |
| Q2H      | 0.0784        | <b>0.6260</b> | 0.0431        | 0.0993        | -0.4864       | 0.3537     |

Table S2.2 Eigenvalues for the exploratory factor analysis (S1.1)

| Factor | Eigenvalue |
|--------|------------|
| 1      | 3.07       |
| 2      | 2.47       |
| 3      | 1.76       |
| 4      | 1.41       |
| 5      | 1.07       |

Table S2.3 Factor scales for the exploratory factor analysis (S1.1)

| Factor | Questions          | Alpha | Mean (SD)   |
|--------|--------------------|-------|-------------|
| 1      | 1B, 1C, 1D, 1G, 1H | 0.75  | 2.40 (0.77) |
| 2      | 2E, 2F, 2G, 2H     | 0.71  | 2.39 (0.88) |
| 3      | 1E, 1F             | 0.65  | 3.56 (0.91) |
| 4      | 2A, 2B, 2C, 2D     | 0.52  | 3.06 (0.78) |

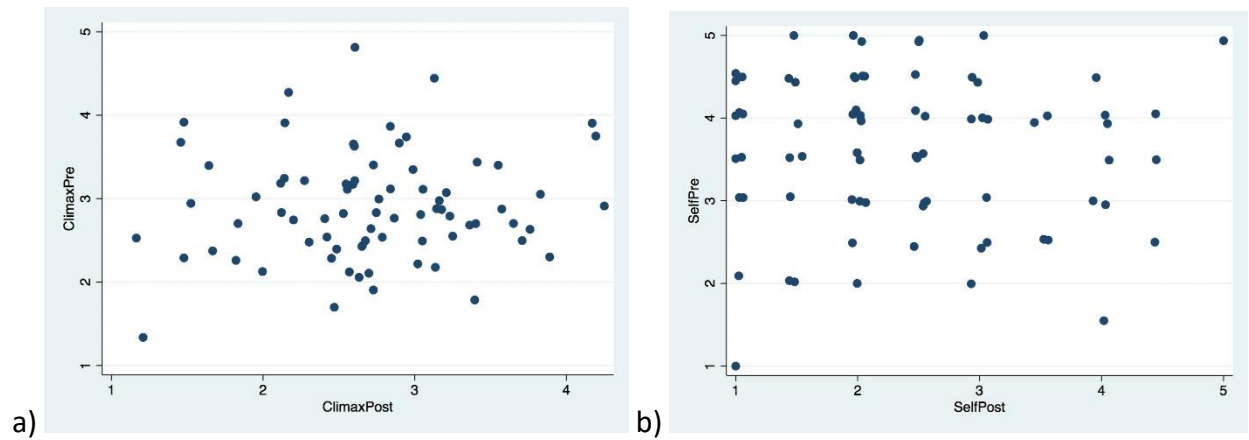

Figure S2.1 Scatterplots (with jiggle) of scales, a) Climax-Pre versus Climax-Post, and b) Self-Pre versus Self-Post
